# Supplementary material
Source: publisher figshare collection journal article supplement (https://asha.figshare.com/ndownloader/files/17476016)
Supplement: Supplementary file 1 [file 17476016]

**Supplemental Material S1. Clinical Assessment of Dysphagia With Wallenberg Syndrome (CADWS).**

1. The range of larynx elevation: try to dry swallow.

10 = complete,  $\geq 2$  cm, and with no delay;

8 = complete,  $\geq 2$  cm, with a delay and unsteadiness;

6 = incomplete,  $\geq 1$  cm,  $< 2$  cm;

4 = slightly incomplete;

2 = Not done, and he/she knows how to swallow;

0 = Not done, and he/she doesn't know how to swallow

2. Pharyngeal residue and postural modification: try to safely swallow 2 ml (1-spoon) thin paste by oral intake.

10 = without head rotation, effortless, no cough and spit;

8 = with slight head rotation, effortless, no cough and spit;

6 = with obvious head rotation, effortless, no cough and spit;

4 = with obvious head rotation, effortless, cough and spit some thin paste;

2 = with obvious head rotation, effortfully, cough and spit some thin paste;

0 = with obvious head rotation, effortfully, cough and spit all thin paste
